# Supplementary material
Source: PubMed Central journal article supplement (PMC6498001)
Supplement: JCM.01794-18-s0002.pdf [file JCM.01794-18-s0002.pdf]

**TABLE S1** List of HPV types detectable by TypeSeq and Linear Array.

| HPV Genotype | Genotype Detectable by Assay |                                         |
|--------------|------------------------------|-----------------------------------------|
|              | TypeSeq                      | Linear Array                            |
| 3            | Yes                          | No                                      |
| 6            | Yes                          | Yes                                     |
| 11           | Yes                          | Yes                                     |
| 13           | Yes                          | No                                      |
| 16           | Yes                          | Yes                                     |
| 18           | Yes                          | Yes                                     |
| 26           | Yes                          | Yes                                     |
| 28           | Yes                          | No                                      |
| 30           | Yes                          | No                                      |
| 31           | Yes                          | Yes                                     |
| 32           | Yes                          | No                                      |
| 33           | Yes                          | Yes                                     |
| 34           | Yes                          | Yes (as 64) <sup>a</sup>                |
| 35           | Yes                          | Yes                                     |
| 39           | Yes                          | Yes                                     |
| 40           | Yes                          | Yes                                     |
| 42           | Yes                          | Yes                                     |
| 43           | Yes                          | No                                      |
| 44           | Yes                          | Yes (as 55) <sup>a</sup>                |
| 45           | Yes                          | Yes                                     |
| 51           | Yes                          | Yes                                     |
| 52           | Yes                          | Yes                                     |
| 53           | Yes                          | Yes                                     |
| 54           | Yes                          | Yes                                     |
| 56           | Yes                          | Yes                                     |
| 58           | Yes                          | Yes                                     |
| 59           | Yes                          | Yes                                     |
| 61           | Yes                          | Yes                                     |
| 62           | Yes                          | Yes                                     |
| 66           | Yes                          | Yes                                     |
| 67           | Yes                          | Yes                                     |
| 68           | Yes                          | Yes (lineages C-F only, formerly "68b") |
| 69           | Yes                          | Yes                                     |
| 70           | Yes                          | Yes                                     |
| 71           | Yes                          | Yes                                     |
| 72           | Yes                          | No                                      |
| 73           | Yes                          | Yes                                     |
| 74           | Yes                          | No                                      |
| 76           | Yes                          | No                                      |
| 81           | Yes                          | Yes                                     |
| 82           | Yes                          | Yes                                     |
| 83           | Yes                          | Yes                                     |
| 84           | Yes                          | Yes                                     |
| 85           | Yes                          | No                                      |
| 86           | Yes                          | No                                      |
| 87           | Yes                          | No                                      |
| 89           | Yes                          | Yes                                     |
| 90           | Yes                          | No                                      |
| 91           | Yes                          | No                                      |
| 97           | Yes                          | No                                      |
| 114          | Yes                          | No                                      |

<sup>a</sup>HPV64 has been re-classified as HPV34, and HPV55 is now HPV44.

## Stage 2 Re-Coding PCR Example – HPV52 universal forward priming region

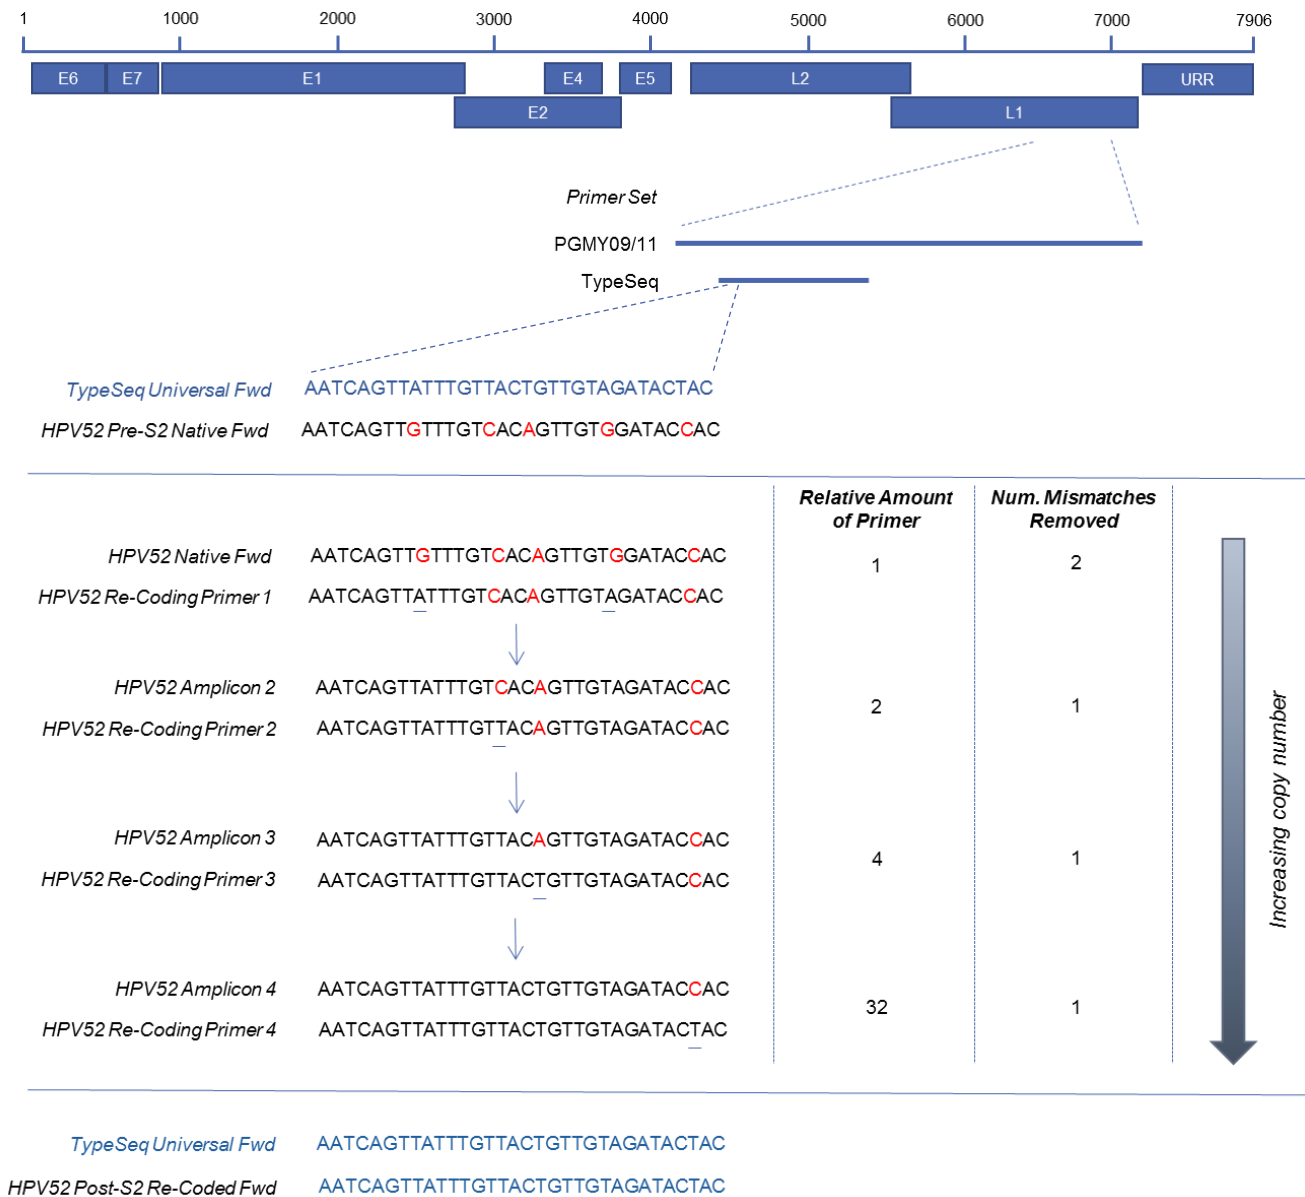

**FIG S1** An example of the TypeSeq Stage 2 Re-Coding PCR process for the forward universal priming region of HPV52, performed to improve compatibility with the TypeSeq universal forward primer. The locations within the L1 gene of the HPV genome of the PGMY09/11 consensus priming region used in Linear Array and of the TypeSeq universal target region are shown. After S1 amplification with type-specific primers, the universal priming regions of each HPV amplicon are amplified with S2 re-coding primers under constant, low stringency conditions. Each of the 170 S2 primers is designed to be partially

homologous to a template strand (either the S1 products, or newly-synthesized S2 strands), with 1 or 2 mismatches homologous to the universal primer sequence rather than the native HPV type's sequence. S2 primer amounts are deliberately low, so that when primers homologous to a target sequence have been depleted, remaining unincorporated primers with the closest homology will then preferentially anneal. With each new primer incorporated, the native HPV sequence is gradually modified to be more homologous to the universal primer, with copy number also increasing in tandem with universal primer homology. Fwd = forward.

**A STAGE 1 PCR COMPOSITION**

| COMPONENT                           | Vol 1x (μL) |
|-------------------------------------|-------------|
| Nuclease-free water                 | 0.45        |
| Polyethylene Glycol 8000 (15%)      | 4.00        |
| Tetramethylammonium Chloride (5 M)  | 0.24        |
| MgSO <sub>4</sub> (100 mM)          | 0.144       |
| 10 mM dNTPs                         | 0.42        |
| 10x Thermopool Buffer               | 1.20        |
| BSA (non-acetylated; 50 mg/mL)      | 0.096       |
| Stage 1 Primer Pool (50 μM)         | 0.23        |
| RNase H2 (2 U/μL)                   | 0.02        |
| Vent (exo-) DNA Polymerase (2 U/μL) | 0.20        |
| Genomic DNA                         | 5.00        |
| <b>Final Volume</b>                 | <b>12</b>   |

**STAGE 1 CYCLING CONDITIONS**

| STEP                  | TEMP     | TIME   |                    |
|-----------------------|----------|--------|--------------------|
| Initial Denaturation  | 95°C     | 2 min  |                    |
| Denaturation          | 95°C     | 10 sec | <b>x 2 cycles</b>  |
| Annealing & Extension | 60°C     | 2 min  |                    |
| Denaturation          | 95°C     | 10 sec | <b>x 43 cycles</b> |
| Annealing & Extension | 62°C     | 4 min  |                    |
| Final Extension       | 68°C     | 7 min  |                    |
| Hold                  | 4 - 10°C | ∞      |                    |

**B STAGE 2 PCR COMPOSITION**

| COMPONENT                                | Vol 1x (μL) |
|------------------------------------------|-------------|
| Nuclease-free water                      | 1.48        |
| Polyethylene Glycol 8000 (15%)           | 2.00        |
| MgCl <sub>2</sub> (25 mM)                | 1.08        |
| 10 mM dNTPs                              | 0.20        |
| 5x OneTaq Standard Buffer                | 2.00        |
| Stage 2 Primer Pool (25 μM)              | 0.21        |
| OneTaq Hot Start DNA Polymerase (5 U/μL) | 0.035       |
| Stage 1 reaction (diluted)               | 3.00        |
| <b>Final Volume</b>                      | <b>10</b>   |

**STAGE 2 CYCLING CONDITIONS**

| STEP                 | TEMP     | TIME   |                    |
|----------------------|----------|--------|--------------------|
| Initial Denaturation | 94°C     | 2 min  |                    |
| Denaturation         | 94°C     | 10 sec | <b>x 20 cycles</b> |
| Annealing            | 38°C     | 4 min  |                    |
| Extension            | 65°C     | 40 sec |                    |
| Final Extension      | 65°C     | 5 min  |                    |
| Hold                 | 4 - 10°C | ∞      |                    |

**C STAGE 3 PCR COMPOSITION**

| COMPONENT                                | Vol 1x (μL) |
|------------------------------------------|-------------|
| Nuclease-free water                      | 0.50        |
| Polyethylene Glycol 8000 (15%)           | 2.00        |
| MgCl <sub>2</sub> (25 mM)                | 0.28        |
| 10 mM dNTPs                              | 0.20        |
| 5x OneTaq Standard Buffer                | 2.00        |
| OneTaq Hot Start DNA Polymerase (5 U/μL) | 0.02        |
| Stage 3 Barcoded Primers (0.4 μM)        | 3.00        |
| Stage 2 Exonuclease I-treated reaction   | 2.00        |
| <b>Final Volume</b>                      | <b>10</b>   |

**STAGE 3 CYCLING CONDITIONS**

| STEP                  | TEMP     | TIME   |                    |
|-----------------------|----------|--------|--------------------|
| Initial Denaturation  | 94°C     | 2 min  |                    |
| Denaturation          | 94°C     | 15 sec | <b>x 3 cycles</b>  |
| Annealing             | 42°C     | 4 min  |                    |
| Extension             | 65°C     | 40 sec |                    |
| Denaturation          | 94°C     | 15 sec | <b>x 13 cycles</b> |
| Annealing & Extension | 65°C     | 1 min  |                    |
| Final Extension       | 65°C     | 5 min  |                    |
| Hold                  | 4 - 10°C | ∞      |                    |

**FIG S2** Composition and thermal cycling conditions for TypeSeq Stages 1, 2 and 3.

**TABLE S2** Analytic sensitivity of the TypeSeq assay for single and multiple HPV type reactions.<sup>a</sup>

| Synthetic control HPV genotype | SINGLE HPV TYPE REACTIONS                                                                   |     |     | Analytical sensitivity of single type reactions | MULTIPLE HPV TYPE REACTIONS                                                                                                              |     | Analytical sensitivity of low input multiple type mixture |
|--------------------------------|---------------------------------------------------------------------------------------------|-----|-----|-------------------------------------------------|------------------------------------------------------------------------------------------------------------------------------------------|-----|-----------------------------------------------------------|
|                                | No. of positive samples/no. of samples tested at the specified HPV copy number per reaction |     |     |                                                 | No. of positive samples/no. of samples tested at the specified HPV copy number per reaction in the presence of 50K copies of other types |     |                                                           |
|                                | 10                                                                                          | 25  | 50  |                                                 | 10                                                                                                                                       | 25  |                                                           |
| 3                              | 6/6                                                                                         | 6/6 | 6/6 | 10                                              | 6/6                                                                                                                                      | 6/6 | 10                                                        |
| 6                              | 6/6                                                                                         | 6/6 | 6/6 | 10                                              | 6/6                                                                                                                                      | 6/6 | 10                                                        |
| 11                             | 6/6                                                                                         | 6/6 | 6/6 | 10                                              | 6/6                                                                                                                                      | 6/6 | 10                                                        |
| 13                             | 6/6                                                                                         | 6/6 | 6/6 | 10                                              | 6/6                                                                                                                                      | 6/6 | 10                                                        |
| 16                             | 6/6                                                                                         | 6/6 | 6/6 | 10                                              | 6/6                                                                                                                                      | 6/6 | 10                                                        |
| 18                             | 6/6                                                                                         | 6/6 | 6/6 | 10                                              | 6/6                                                                                                                                      | 6/6 | 10                                                        |
| 26                             | 6/6                                                                                         | 6/6 | 6/6 | 10                                              | 6/6                                                                                                                                      | 6/6 | 10                                                        |
| 28                             | 6/6                                                                                         | 6/6 | 6/6 | 10                                              | 6/6                                                                                                                                      | 6/6 | 10                                                        |
| 30                             | 6/6                                                                                         | 6/6 | 6/6 | 10                                              | 6/6                                                                                                                                      | 6/6 | 10                                                        |
| 31                             | 6/6                                                                                         | 6/6 | 6/6 | 10                                              | 6/6                                                                                                                                      | 6/6 | 10                                                        |
| 32                             | 6/6                                                                                         | 6/6 | 6/6 | 10                                              | 6/6                                                                                                                                      | 6/6 | 10                                                        |
| 33                             | 6/6                                                                                         | 6/6 | 6/6 | 10                                              | 6/6                                                                                                                                      | 6/6 | 10                                                        |
| 34                             | 6/6                                                                                         | 6/6 | 6/6 | 10                                              | 6/6                                                                                                                                      | 6/6 | 10                                                        |
| 35                             | 6/6                                                                                         | 6/6 | 6/6 | 10                                              | 6/6                                                                                                                                      | 6/6 | 10                                                        |
| 39                             | 6/6                                                                                         | 6/6 | 6/6 | 10                                              | 4/6                                                                                                                                      | 6/6 | 25                                                        |
| 40                             | 6/6                                                                                         | 6/6 | 6/6 | 10                                              | 6/6                                                                                                                                      | 6/6 | 10                                                        |
| 42                             | 5/6                                                                                         | 6/6 | 6/6 | 25                                              | 4/6                                                                                                                                      | 6/6 | 25                                                        |
| 43                             | 6/6                                                                                         | 6/6 | 6/6 | 10                                              | 6/6                                                                                                                                      | 6/6 | 10                                                        |
| 44                             | 6/6                                                                                         | 6/6 | 6/6 | 10                                              | 4/6                                                                                                                                      | 6/6 | 25                                                        |
| 45                             | 6/6                                                                                         | 6/6 | 6/6 | 10                                              | 6/6                                                                                                                                      | 6/6 | 10                                                        |
| 51                             | 6/6                                                                                         | 6/6 | 6/6 | 10                                              | 6/6                                                                                                                                      | 6/6 | 10                                                        |
| 52                             | 6/6                                                                                         | 6/6 | 6/6 | 10                                              | 6/6                                                                                                                                      | 6/6 | 10                                                        |
| 53                             | 6/6                                                                                         | 6/6 | 6/6 | 10                                              | 6/6                                                                                                                                      | 6/6 | 10                                                        |
| 54                             | 6/6                                                                                         | 6/6 | 6/6 | 10                                              | 5/6                                                                                                                                      | 6/6 | 25                                                        |
| 56                             | 6/6                                                                                         | 6/6 | 6/6 | 10                                              | 6/6                                                                                                                                      | 6/6 | 10                                                        |
| 58                             | 6/6                                                                                         | 6/6 | 6/6 | 10                                              | 6/6                                                                                                                                      | 6/6 | 10                                                        |
| 59                             | 6/6                                                                                         | 6/6 | 6/6 | 10                                              | 6/6                                                                                                                                      | 6/6 | 10                                                        |
| 61                             | 6/6                                                                                         | 6/6 | 6/6 | 10                                              | 6/6                                                                                                                                      | 6/6 | 10                                                        |
| 62                             | 6/6                                                                                         | 6/6 | 6/6 | 10                                              | 6/6                                                                                                                                      | 6/6 | 10                                                        |
| 66                             | 6/6                                                                                         | 6/6 | 6/6 | 10                                              | 6/6                                                                                                                                      | 6/6 | 10                                                        |
| 67                             | 6/6                                                                                         | 6/6 | 6/6 | 10                                              | 6/6                                                                                                                                      | 6/6 | 10                                                        |
| 68                             | 6/6                                                                                         | 6/6 | 6/6 | 10                                              | 6/6                                                                                                                                      | 6/6 | 10                                                        |
| 69                             | 6/6                                                                                         | 6/6 | 6/6 | 10                                              | 6/6                                                                                                                                      | 6/6 | 10                                                        |
| 70                             | 6/6                                                                                         | 6/6 | 6/6 | 10                                              | 6/6                                                                                                                                      | 6/6 | 10                                                        |
| 71                             | 6/6                                                                                         | 6/6 | 6/6 | 10                                              | 6/6                                                                                                                                      | 6/6 | 10                                                        |
| 72                             | 6/6                                                                                         | 6/6 | 6/6 | 10                                              | 6/6                                                                                                                                      | 6/6 | 10                                                        |
| 73                             | 6/6                                                                                         | 6/6 | 6/6 | 10                                              | 6/6                                                                                                                                      | 6/6 | 10                                                        |
| 74                             | 6/6                                                                                         | 6/6 | 6/6 | 10                                              | 5/6                                                                                                                                      | 6/6 | 25                                                        |
| 76                             | 6/6                                                                                         | 6/6 | 6/6 | 10                                              | 5/6                                                                                                                                      | 6/6 | 25                                                        |
| 81                             | 6/6                                                                                         | 6/6 | 6/6 | 10                                              | 6/6                                                                                                                                      | 6/6 | 10                                                        |
| 82                             | 6/6                                                                                         | 6/6 | 6/6 | 10                                              | 6/6                                                                                                                                      | 6/6 | 10                                                        |
| 83                             | 6/6                                                                                         | 6/6 | 6/6 | 10                                              | 6/6                                                                                                                                      | 6/6 | 10                                                        |
| 84                             | 6/6                                                                                         | 6/6 | 6/6 | 10                                              | 6/6                                                                                                                                      | 6/6 | 10                                                        |
| 85                             | 6/6                                                                                         | 6/6 | 6/6 | 10                                              | 6/6                                                                                                                                      | 6/6 | 10                                                        |
| 86                             | 6/6                                                                                         | 6/6 | 6/6 | 10                                              | 6/6                                                                                                                                      | 6/6 | 10                                                        |
| 87                             | 6/6                                                                                         | 6/6 | 6/6 | 10                                              | 6/6                                                                                                                                      | 6/6 | 10                                                        |
| 89                             | 6/6                                                                                         | 6/6 | 6/6 | 10                                              | 6/6                                                                                                                                      | 6/6 | 10                                                        |
| 90                             | 6/6                                                                                         | 6/6 | 6/6 | 10                                              | 6/6                                                                                                                                      | 6/6 | 10                                                        |
| 91                             | 6/6                                                                                         | 6/6 | 6/6 | 10                                              | 6/6                                                                                                                                      | 6/6 | 10                                                        |
| 97                             | 5/6                                                                                         | 6/6 | 6/6 | 25                                              | 5/6                                                                                                                                      | 6/6 | 25                                                        |
| 114                            | 6/6                                                                                         | 6/6 | 6/6 | 10                                              | 6/6                                                                                                                                      | 6/6 | 10                                                        |

<sup>a</sup> Testing was performed on 500 bp synthetic dsDNA control fragments in a minimum of 2 batches, for a total of 6 replicates per condition.

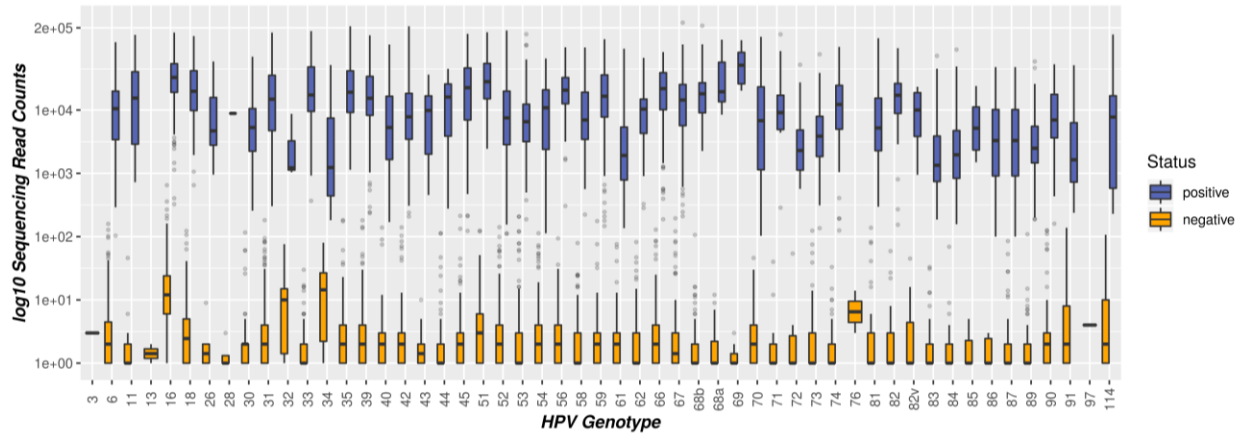

**FIG S3** TypeSeq sequencing read count signal-to-noise plot for 849 clinical specimens. Read count distributions are shown on a log<sub>10</sub> scale for specimens grouped by positive (blue) or negative (orange) type status. HPV3, 13, 76 and 97 were negative for all specimens. A single specimen was positive for HPV28. HPV68a (lineages A and B), 68b (lineages C-F), 82, and 82v are uniquely identifiable by TypeSeq and individual results are shown.

**TABLE S3** TypeSeq reproducibility testing on 118 clinical specimens in duplicate.

| HPV Genotype            | Number of Specimens |          |         |          | % Prevalence |      | % Agreement |          |
|-------------------------|---------------------|----------|---------|----------|--------------|------|-------------|----------|
|                         | R1-/R2-             | R1+ /R2- | R1-/R2+ | R1+ /R2+ | R1           | R2   | Total       | Positive |
| Any HPV                 | 0                   | 2        | 0       | 116      | 100.0        | 98.3 | 98.3        | 98.3     |
| Any HR-HPV <sup>a</sup> | 13                  | 0        | 1       | 104      | 88.1         | 89.0 | 99.2        | 99.0     |
| 16/18                   | 73                  | 0        | 1       | 44       | 37.3         | 38.1 | 99.2        | 97.8     |
| 3                       | 118                 | 0        | 0       | 0        | 0.0          | 0.0  | 100         | NE       |
| 6                       | 110                 | 0        | 0       | 8        | 6.8          | 6.8  | 100         | 100      |
| 11                      | 113                 | 0        | 1       | 4        | 3.4          | 4.2  | 99.2        | 80.0     |
| 13                      | 118                 | 0        | 0       | 0        | 0.0          | 0.0  | 100         | NE       |
| 16                      | 85                  | 1        | 0       | 32       | 28.0         | 27.1 | 99.2        | 97.1     |
| 18                      | 101                 | 0        | 2       | 15       | 12.7         | 14.4 | 98.3        | 88.2     |
| 26                      | 116                 | 0        | 0       | 2        | 1.7          | 1.7  | 100         | 100      |
| 28                      | 118                 | 0        | 0       | 0        | 0.0          | 0.0  | 100         | NE       |
| 30                      | 107                 | 0        | 1       | 10       | 8.5          | 9.3  | 99.2        | 90.9     |
| 31                      | 104                 | 0        | 0       | 14       | 11.9         | 11.9 | 100         | 100      |
| 32                      | 117                 | 0        | 0       | 1        | 0.8          | 0.8  | 100         | 100      |
| 33                      | 108                 | 0        | 0       | 10       | 8.5          | 8.5  | 100         | 100      |
| 34                      | 114                 | 0        | 0       | 4        | 3.4          | 3.4  | 100         | 100      |
| 35                      | 108                 | 0        | 0       | 10       | 8.5          | 8.5  | 100         | 100      |
| 39                      | 101                 | 1        | 1       | 15       | 13.6         | 13.6 | 98.3        | 88.2     |
| 40                      | 114                 | 0        | 0       | 4        | 3.4          | 3.4  | 100         | 100      |
| 42                      | 98                  | 0        | 1       | 19       | 16.1         | 16.9 | 99.2        | 95.0     |
| 43                      | 117                 | 0        | 0       | 1        | 0.8          | 0.8  | 100         | 100      |
| 44                      | 106                 | 0        | 0       | 12       | 10.2         | 10.2 | 100         | 100      |
| 45                      | 108                 | 0        | 1       | 9        | 7.6          | 8.5  | 99.2        | 90.0     |
| 51                      | 102                 | 1        | 2       | 13       | 11.9         | 12.7 | 97.5        | 81.3     |
| 52                      | 101                 | 0        | 0       | 17       | 14.4         | 14.4 | 100         | 100      |
| 53                      | 100                 | 0        | 0       | 18       | 15.3         | 15.3 | 100         | 100      |
| 54                      | 110                 | 0        | 1       | 7        | 5.9          | 6.8  | 99.2        | 87.5     |
| 56                      | 100                 | 0        | 0       | 18       | 15.3         | 15.3 | 100         | 100      |
| 58                      | 107                 | 1        | 2       | 8        | 7.6          | 8.5  | 97.5        | 72.7     |
| 59                      | 98                  | 0        | 2       | 18       | 15.3         | 16.9 | 98.3        | 90.0     |
| 61                      | 105                 | 1        | 0       | 12       | 11.0         | 10.2 | 99.2        | 92.3     |
| 62                      | 101                 | 1        | 0       | 16       | 14.4         | 13.6 | 99.2        | 94.1     |
| 66                      | 105                 | 0        | 1       | 12       | 10.2         | 11.0 | 99.2        | 92.3     |
| 67                      | 105                 | 1        | 1       | 11       | 10.2         | 10.2 | 98.3        | 84.6     |
| 68                      | 102                 | 1        | 0       | 15       | 13.6         | 12.7 | 198.3       | 93.8     |
| 69                      | 114                 | 0        | 0       | 4        | 3.4          | 3.4  | 100         | 100      |
| 70                      | 115                 | 0        | 0       | 3        | 2.5          | 2.5  | 100         | 100      |
| 71                      | 116                 | 0        | 0       | 2        | 1.7          | 1.7  | 100         | 100      |
| 72                      | 114                 | 0        | 1       | 3        | 2.5          | 3.4  | 99.2        | 75.0     |
| 73                      | 113                 | 0        | 0       | 5        | 4.2          | 4.2  | 100         | 100      |
| 74                      | 114                 | 0        | 1       | 3        | 2.5          | 3.4  | 99.2        | 75.0     |
| 76                      | 118                 | 0        | 0       | 0        | 0.0          | 0.0  | 100         | NE       |
| 81                      | 110                 | 0        | 0       | 8        | 6.8          | 6.8  | 100         | 100      |
| 82                      | 110                 | 0        | 0       | 8        | 6.8          | 6.8  | 100         | 100      |
| 83                      | 112                 | 1        | 1       | 4        | 4.2          | 4.2  | 98.3        | 66.7     |

TABLE S3 continued

| HPV<br>Genotype | Number of Specimens |          |         |          | % Prevalence |      | % Agreement |          |
|-----------------|---------------------|----------|---------|----------|--------------|------|-------------|----------|
|                 | R1-/R2-             | R1+ /R2- | R1-/R2+ | R1+ /R2+ | R1           | R2   | Total       | Positive |
| 84              | 109                 | 0        | 1       | 8        | 6.8          | 7.6  | 99.2        | 88.9     |
| 85              | 118                 | 0        | 0       | 0        | 0.0          | 0.0  | 100         | NE       |
| 86              | 117                 | 0        | 0       | 1        | 0.8          | 0.8  | 100         | 100      |
| 87              | 113                 | 2        | 0       | 3        | 4.2          | 2.5  | 98.3        | 60.0     |
| 89              | 104                 | 2        | 2       | 10       | 10.2         | 10.2 | 96.6        | 71.4     |
| 90              | 106                 | 0        | 2       | 10       | 8.5          | 10.2 | 98.3        | 83.3     |
| 91              | 115                 | 0        | 1       | 2        | 1.7          | 2.5  | 99.2        | 66.7     |
| 97              | 118                 | 0        | 0       | 0        | 0.0          | 0.0  | 100         | NE       |
| 114             | 114                 | 1        | 0       | 3        | 3.4          | 2.5  | 99.2        | 75.0     |

<sup>a</sup> HR-HPV represents HPV16, 18, 31, 33, 35, 39, 45, 51, 52, 56, 58, 59, and 68.

R1 = replicate 1; R2 = replicate 2. NE = not evaluable.
